# Supplementary material for: Specialized dendritic cells induce tumor-promoting IL-10+IL-17+ FoxP3neg regulatory CD4+ T cells in pancreatic carcinoma
Source: PubMed Central journal article supplement (PMC6441038; doi:10.1038/s41467-019-09416-2), 2019-03-29
Supplement: 41467_2019_9416_MOESM1_ESM.pdf [file 41467_2019_9416_MOESM1_ESM.pdf]

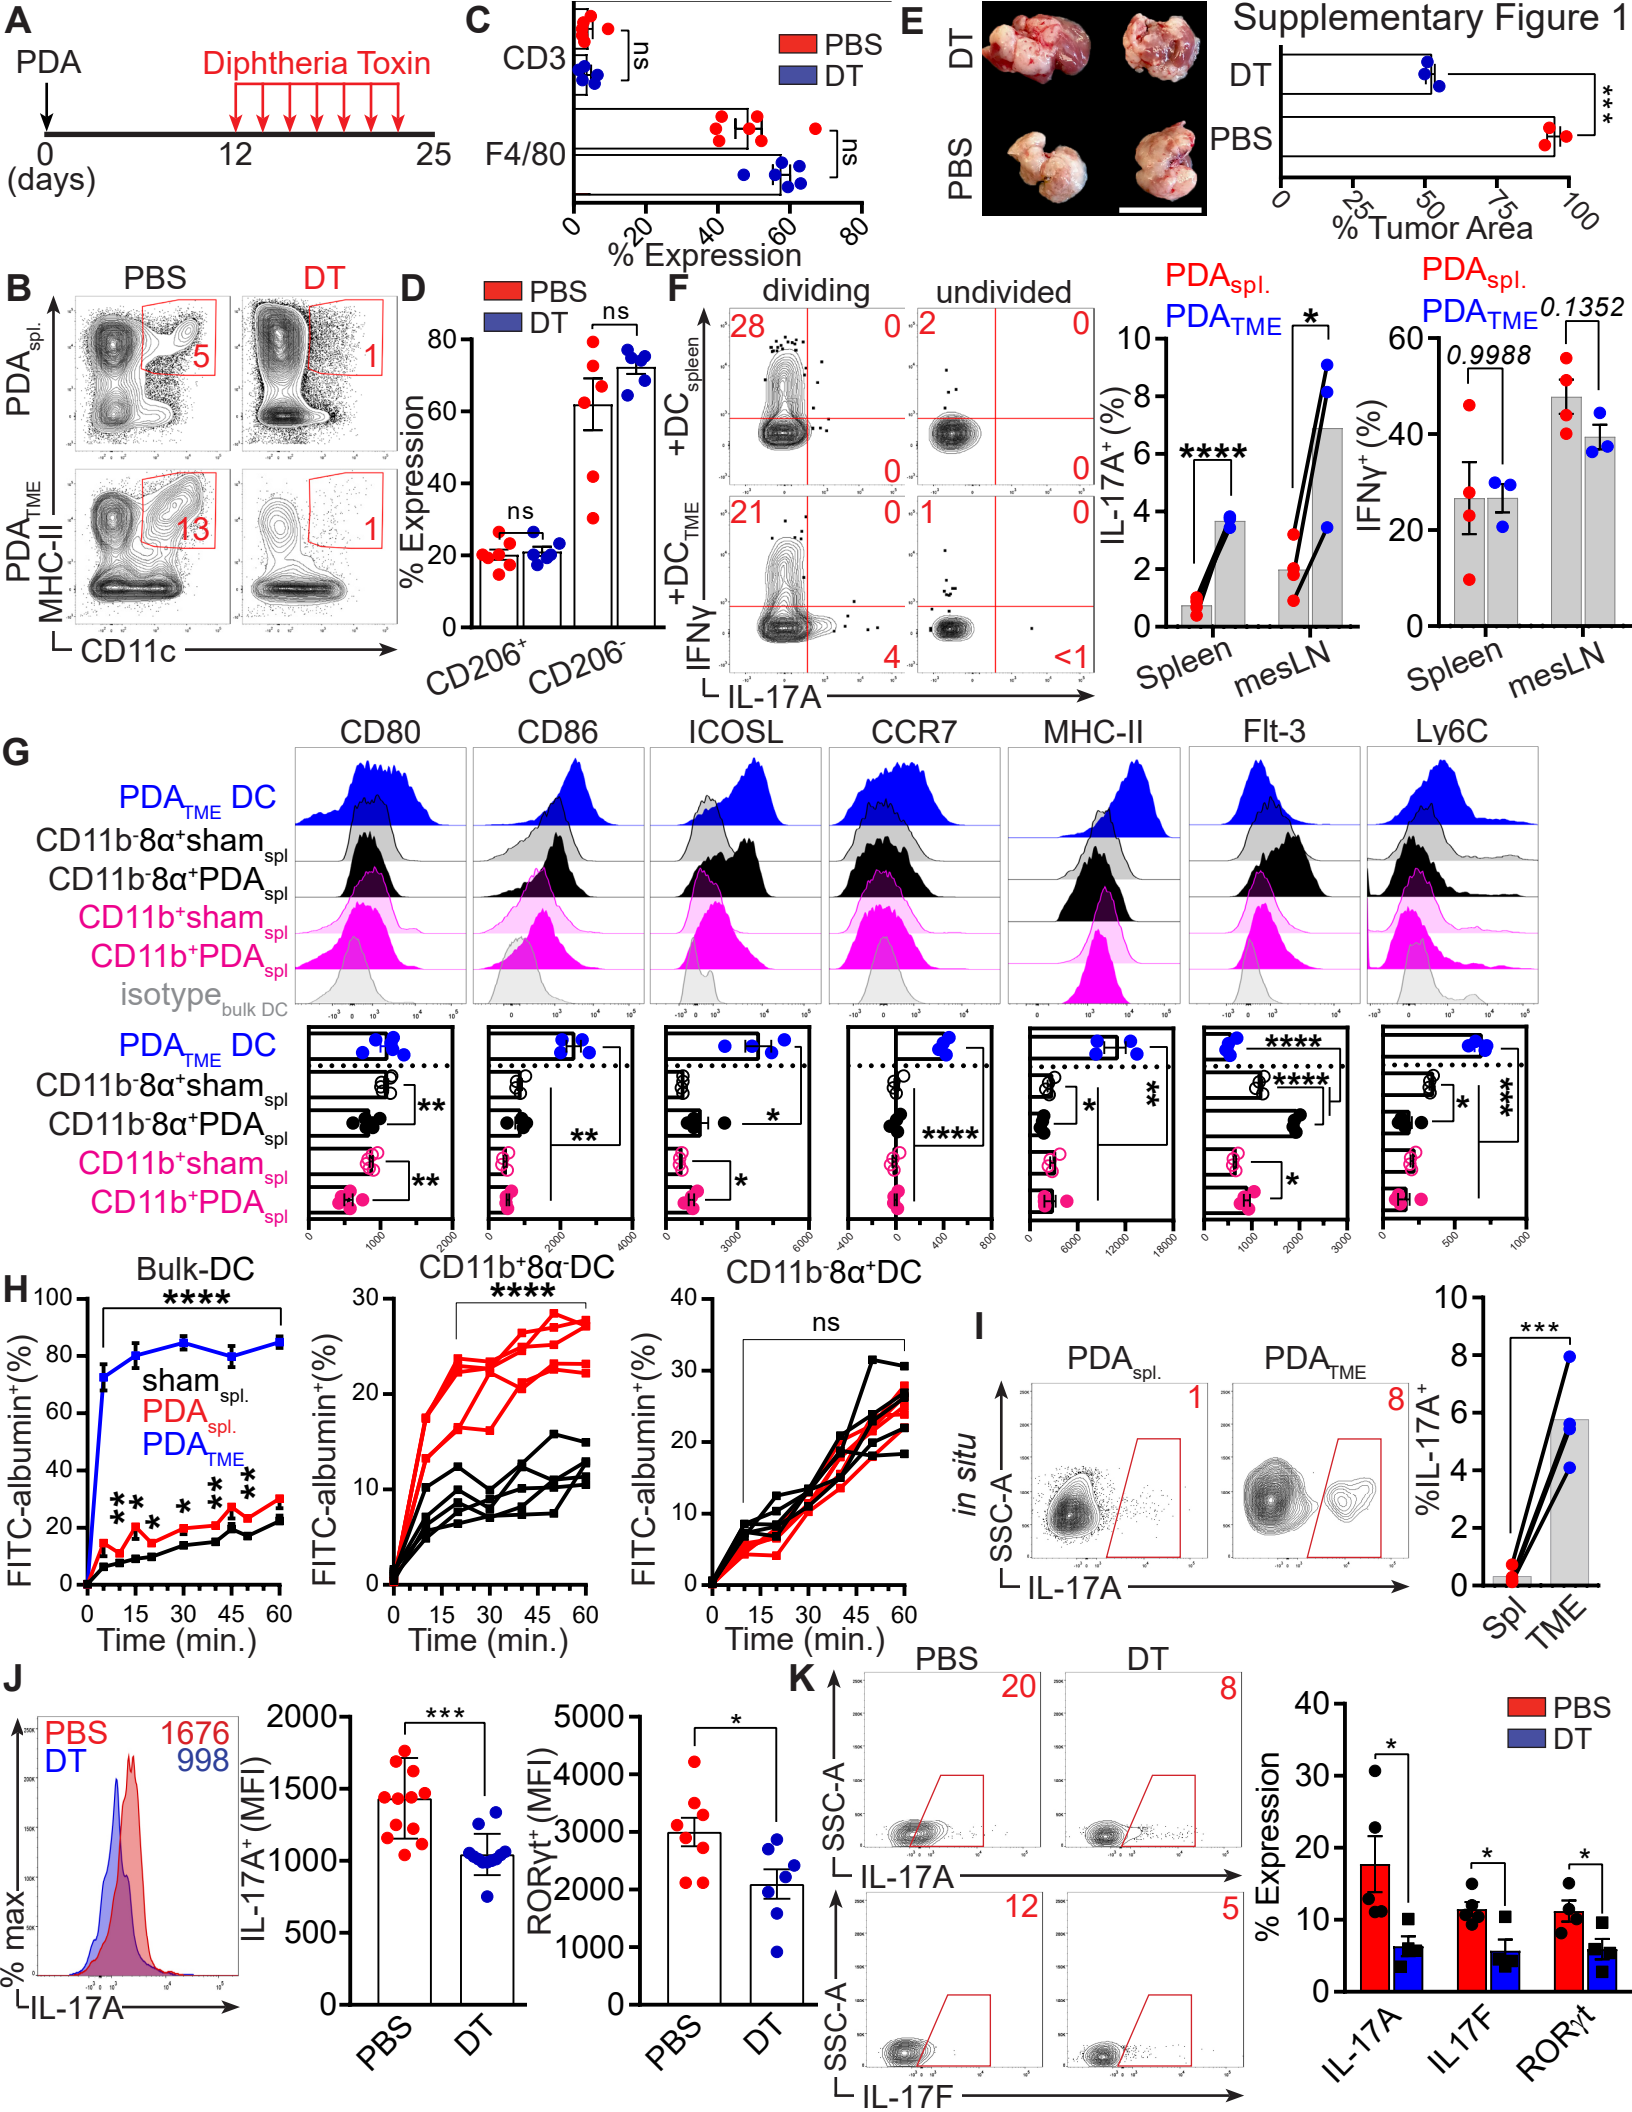

**Supplemental Figure 1. PDA<sub>TME</sub> DC possess a distinctive phenotype.**

**(A)** Schematic showing experiment assessing effects of DC depletion on PDA growth.

CD11c.DTR bone marrow chimeric mice were administered orthotopic PDA. DT or vehicle were serially administered beginning on day 12 after tumor establishment. Mice were sacrificed on day 25.

**(B)** Ablation of DC populations in CD11c.DTR chimeric mice treated with DT was confirmed by flow cytometry analysis of co-expression of CD11c and MHC II. Representative flow cytometry contour plots are shown. This experiment was repeated more than 5 times.

**(C)** CD11c.DTR bone marrow chimeric mice were administered orthotopic PDA. DT or PBS were serially administered beginning on day 12 after tumor establishment. Mice were sacrificed on day 25 and tumor-infiltrating CD45<sup>+</sup> leukocytes were tested for expression of CD3 and F4/80. This experiment was repeated more than 3 times (n=5/group).

**(D)** CD11c.DTR bone marrow chimeric mice were administered orthotopic PDA. DT or PBS were serially administered beginning on day 12 after tumor establishment. Mice were sacrificed on day 25 and tumor-infiltrating F4/80<sup>+</sup> macrophages were tested for expression of CD206. This experiment was repeated twice (n=5/group).

**(E)** CD11c.DTR bone marrow chimeric mice were administered PDA tumor cells via a single splenic injection followed by splenectomy. DT or PBS were serially administered beginning on day 12 after tumor establishment. Mice were sacrificed on day 25. Representative images of livers and quantitative analysis of percentage of liver surface area replaced by tumor are shown. This experiment was repeated twice (n=3/group; scale bars = 1 μm).

**(F)** PDA<sub>TME</sub> and PDA<sub>spl</sub>. DC were harvested, loaded in equal number with Ova<sub>323-339</sub> or Ova<sub>257-264</sub> peptide and administered i.p. to cohorts of CD45.1 mice that had been transferred i.v. 2 days

prior with equal numbers of CFSE-labeled OT-I and OT-II T cells. On day 7 after PDA<sub>TME</sub> or PDA<sub>spl</sub> DC.Ova administration, spleen and mesenteric lymph nodes (LN) were harvested and CD45.2<sup>+</sup> CD4<sup>+</sup> antigen restricted T cells tested for co-expression of IFN $\gamma$  and IL-17A.

Representative contour plots and quantitative data comparing priming using PDA<sub>TME</sub> or PDA<sub>spl</sub> DC are shown. This experiment was repeated twice.

**(G)** Comparison of PDA<sub>TME</sub>, PDA<sub>spl</sub>, and sham<sub>spl</sub> DC subsets expression of the indicated surface markers. Representative histograms and quantitative data based on MFI are shown. Gating strategy for each marker was determined by the fluorescence of the respective isotype control (not shown). This experiment was repeated more than 3 times.

**(H)** PDA<sub>TME</sub>, PDA<sub>spl</sub>, and sham<sub>spl</sub> DC from PDA-bearing or control mice were isolated and pulsed for varying durations with FITC-labeled albumin. Bulk-DC (first panel) as well as splenic CD11b<sup>+</sup>CD8 $\alpha$ <sup>-</sup> DC (middle panel), and CD8 $\alpha$ <sup>+</sup>CD11b<sup>-</sup> DC (last panel) subsets were analyzed by flow cytometry for albumin uptake. This experiment was repeated 3 times and performed in replicates of 5.

**(I)** Tumor-infiltrating and spleen CD4<sup>+</sup> T cells were harvested on day 25 from mice bearing orthotopic PDA and tested for expression of IL-17A. Representative contour plots and quantitative data are shown. Experiments were repeated more than 5 times.

**(J)** CD11c.DTR bone marrow chimeric mice were administered orthotopic PDA. DT or PBS were serially administered beginning on day 12 after tumor establishment. Mice were sacrificed on day 25 and tumor-infiltrating CD4<sup>+</sup> T cells were harvested and tested for expression of IL-17A and ROR $\gamma$ t. Each dot represents data from a single mouse. Experiments were repeated 3 times.

**(K)** CD11c.DTR bone marrow chimeric mice were administered PDA tumor cells via a splenic injection. DT or PBS were serially administered beginning on day 12 after tumor establishment. Mice were sacrificed on day 25 and tumor-infiltrating CD4<sup>+</sup> T cells were harvested and tested for expression of IL-17A, IL-17F, and ROR $\gamma$ t. This experiment was repeated twice (n=3-5/group; \*p<0.05, \*\*p<0.01, \*\*\*p<0.001, \*\*\*\*p<0.0001, *t*-test), SEM.

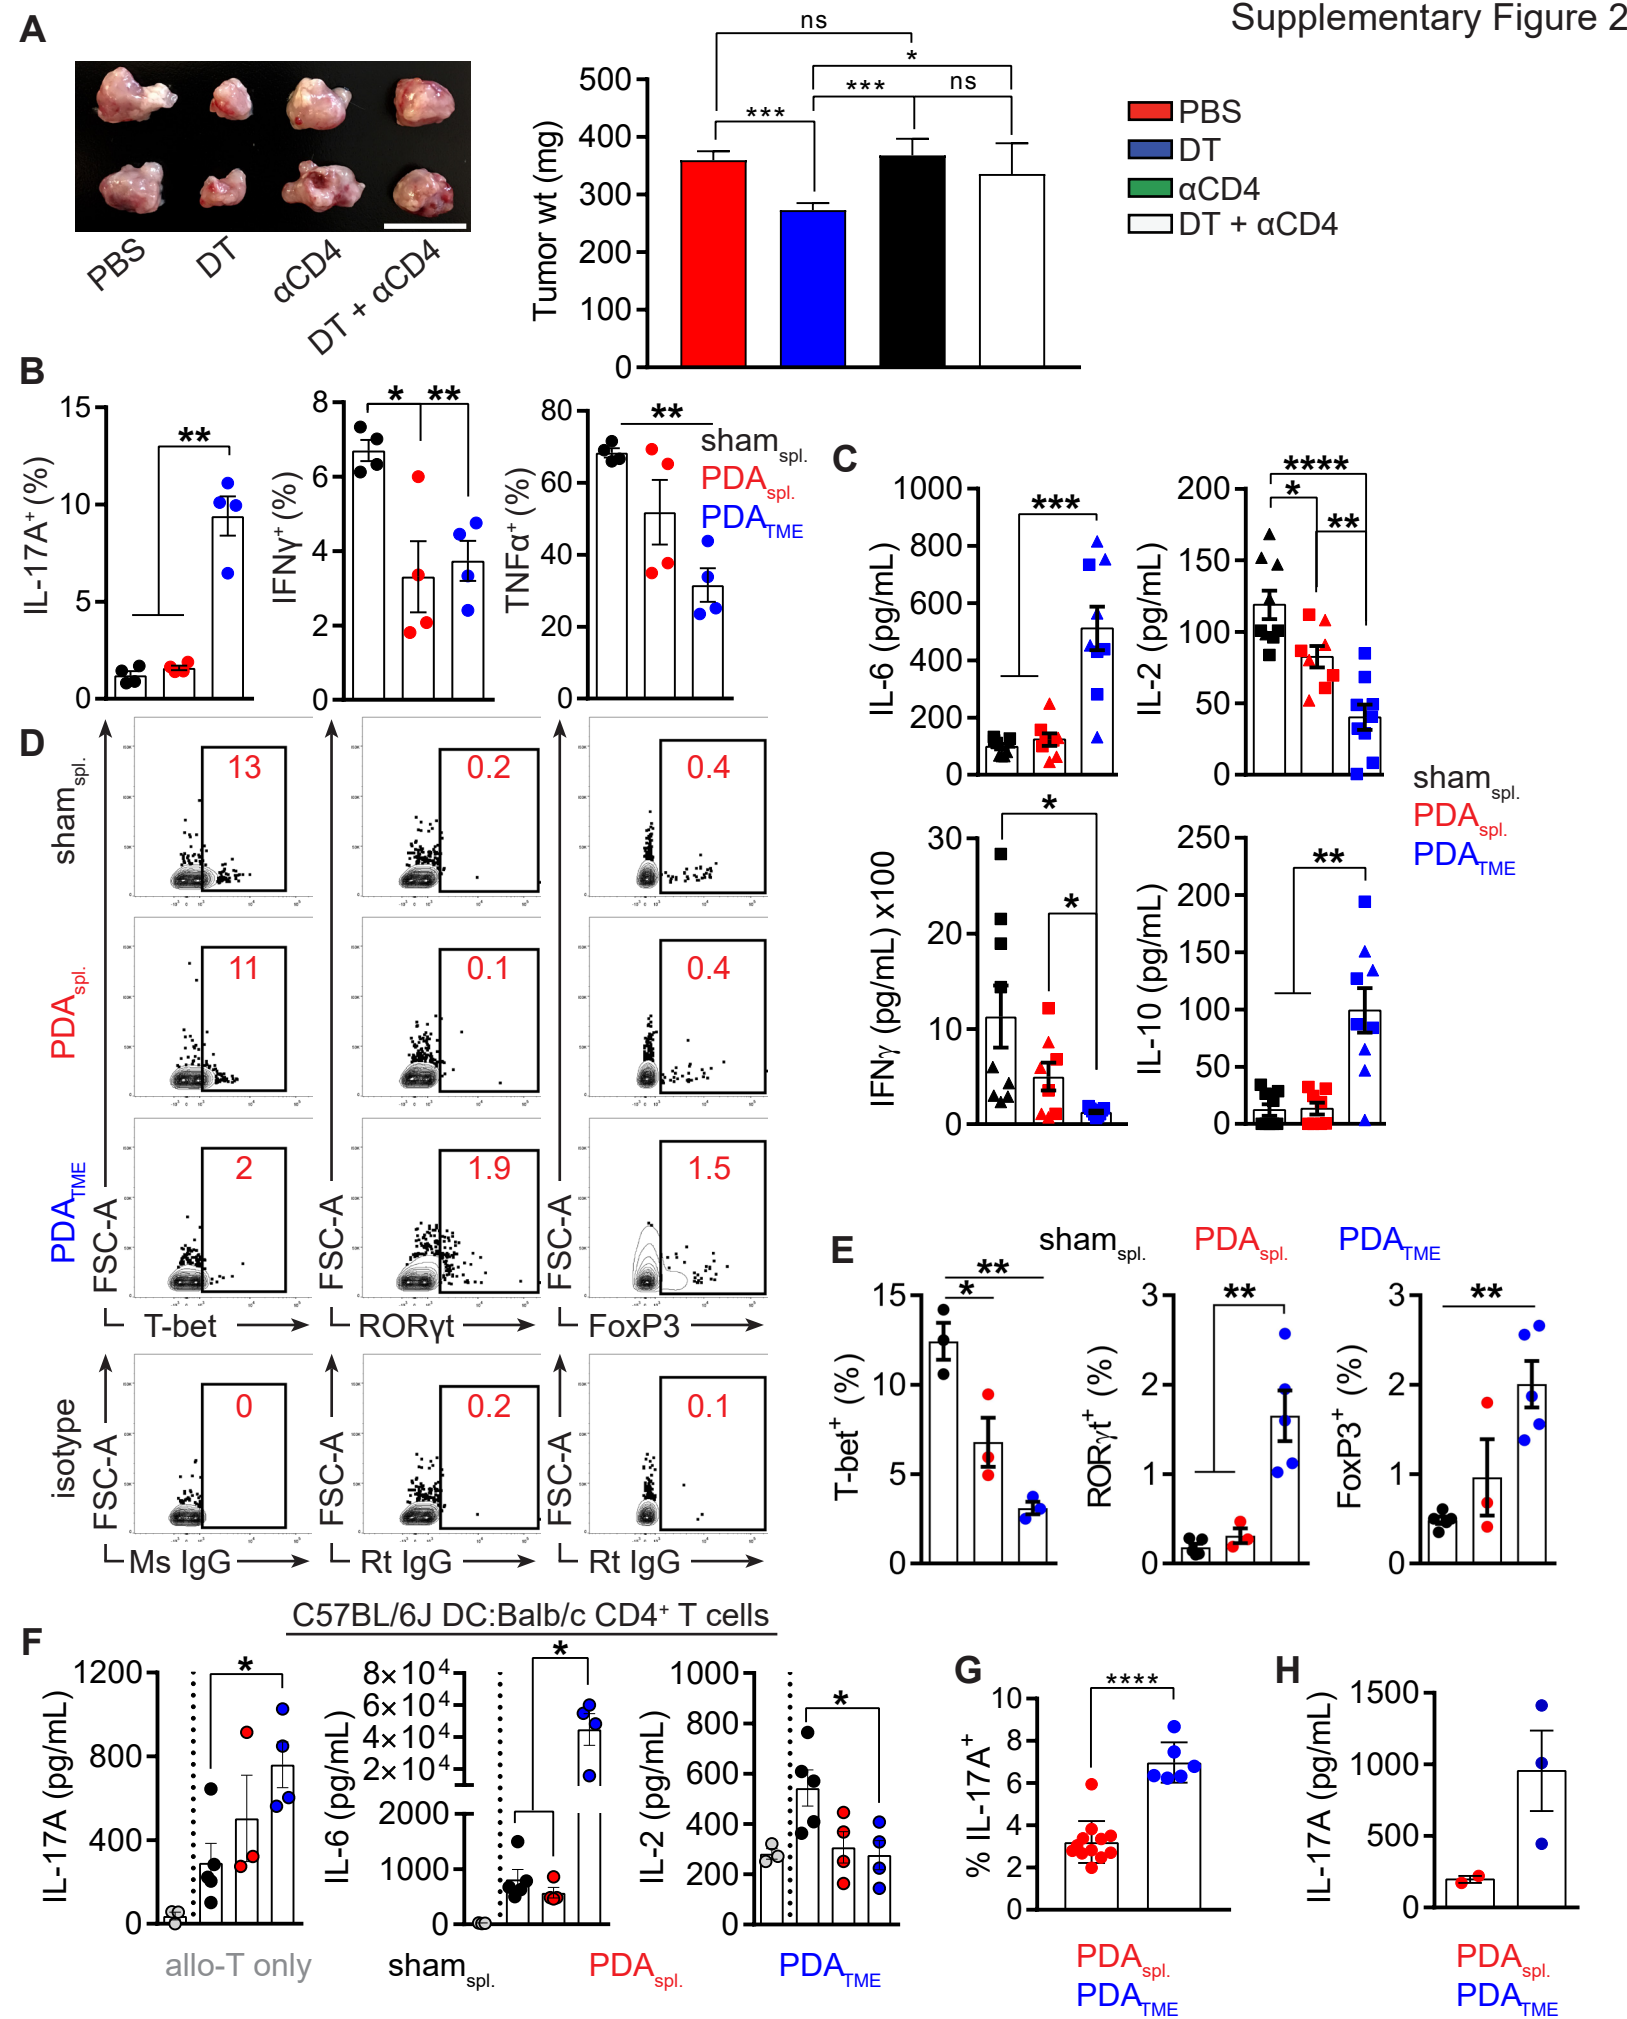

**Supplemental Figure 2. PDA<sub>TME</sub> DC promote tumorigenesis in a CD4<sup>+</sup> T cell dependent manner and elicit distinct CD4<sup>+</sup> T cell differentiation.**

(A) CD11c.DTR bone marrow chimeric mice were challenged with orthotopic PDA and serially treated with DT or PBS beginning on day 12. Cohorts were additionally treated with a neutralizing mAb targeting CD4<sup>+</sup> T cells or isotype control also starting on day 12. Mice were sacrificed on day 25. Representative gross images of tumors and quantitative analysis of tumor weights are shown. This experiment was performed twice with similar results (n=5-10/group; scale bars = 1μm).

(B-E) Ova<sub>323-339</sub> peptide-pulsed PDA<sub>TME</sub>, PDA<sub>spl.</sub>, and sham<sub>spl</sub> DC were co-cultured with Ova-restricted CD4<sup>+</sup> T cells at a 1:5 ratio for 5 days. (B) CD4<sup>+</sup> T cell expression of IL-17A, IFNγ, and TNFα were determined using intracellular cytokine analysis on flow cytometry. (C) IL-6, IL-2, IFNγ, and IL-10 cytokine concentrations were measured in co-culture supernatants. Squares and triangles denote data from individual mice, pooled from two independent experiments. (D-E) Flow cytometric analysis of T<sub>H</sub>-cell transcriptional regulators in Ova-restricted T<sub>H</sub>-cells after co-culture with Ova<sub>323-339</sub> peptide-pulsed PDA<sub>TME</sub>, PDA<sub>spl.</sub>, or sham<sub>spl</sub> DC. Representative (D) and quantitative (E) data are shown. Results are representative of 5 independent experiments.

(F) PDA<sub>TME</sub>, PDA<sub>spl.</sub>, and sham<sub>spl</sub> DC from C57BL/6 mice were co-cultured with allogeneic CD4<sup>+</sup> T cells from Balb/c mice at a 1:5 ratio for 5 days in a mixed lymphocyte reaction. Cytokine concentrations were measured in cell culture supernatants. This experiment was performed twice.

(G) DCs harvested from tumor and spleen of 3-month-old KC mice were co-cultured with OT-II CD4<sup>+</sup> T cells at a 1:5 ratio for 5 days. T cells were gated on flow cytometry and tested for expression of IL-17A and IFNγ. This experiment was performed twice.

**(H)** DCs harvested from tumor and spleen of 3-month-old KPC mice were co-cultured with OT-II CD4<sup>+</sup> T cells at a 1:5 ratio for 5 days. IL-17A and IFN $\gamma$  concentrations were measured in cell culture supernatant. This experiment was repeated twice (\*p<0.05, \*\*p<0.01, \*\*\*p<0.001, \*\*\*\*p<0.0001, *t*-test), SEM.

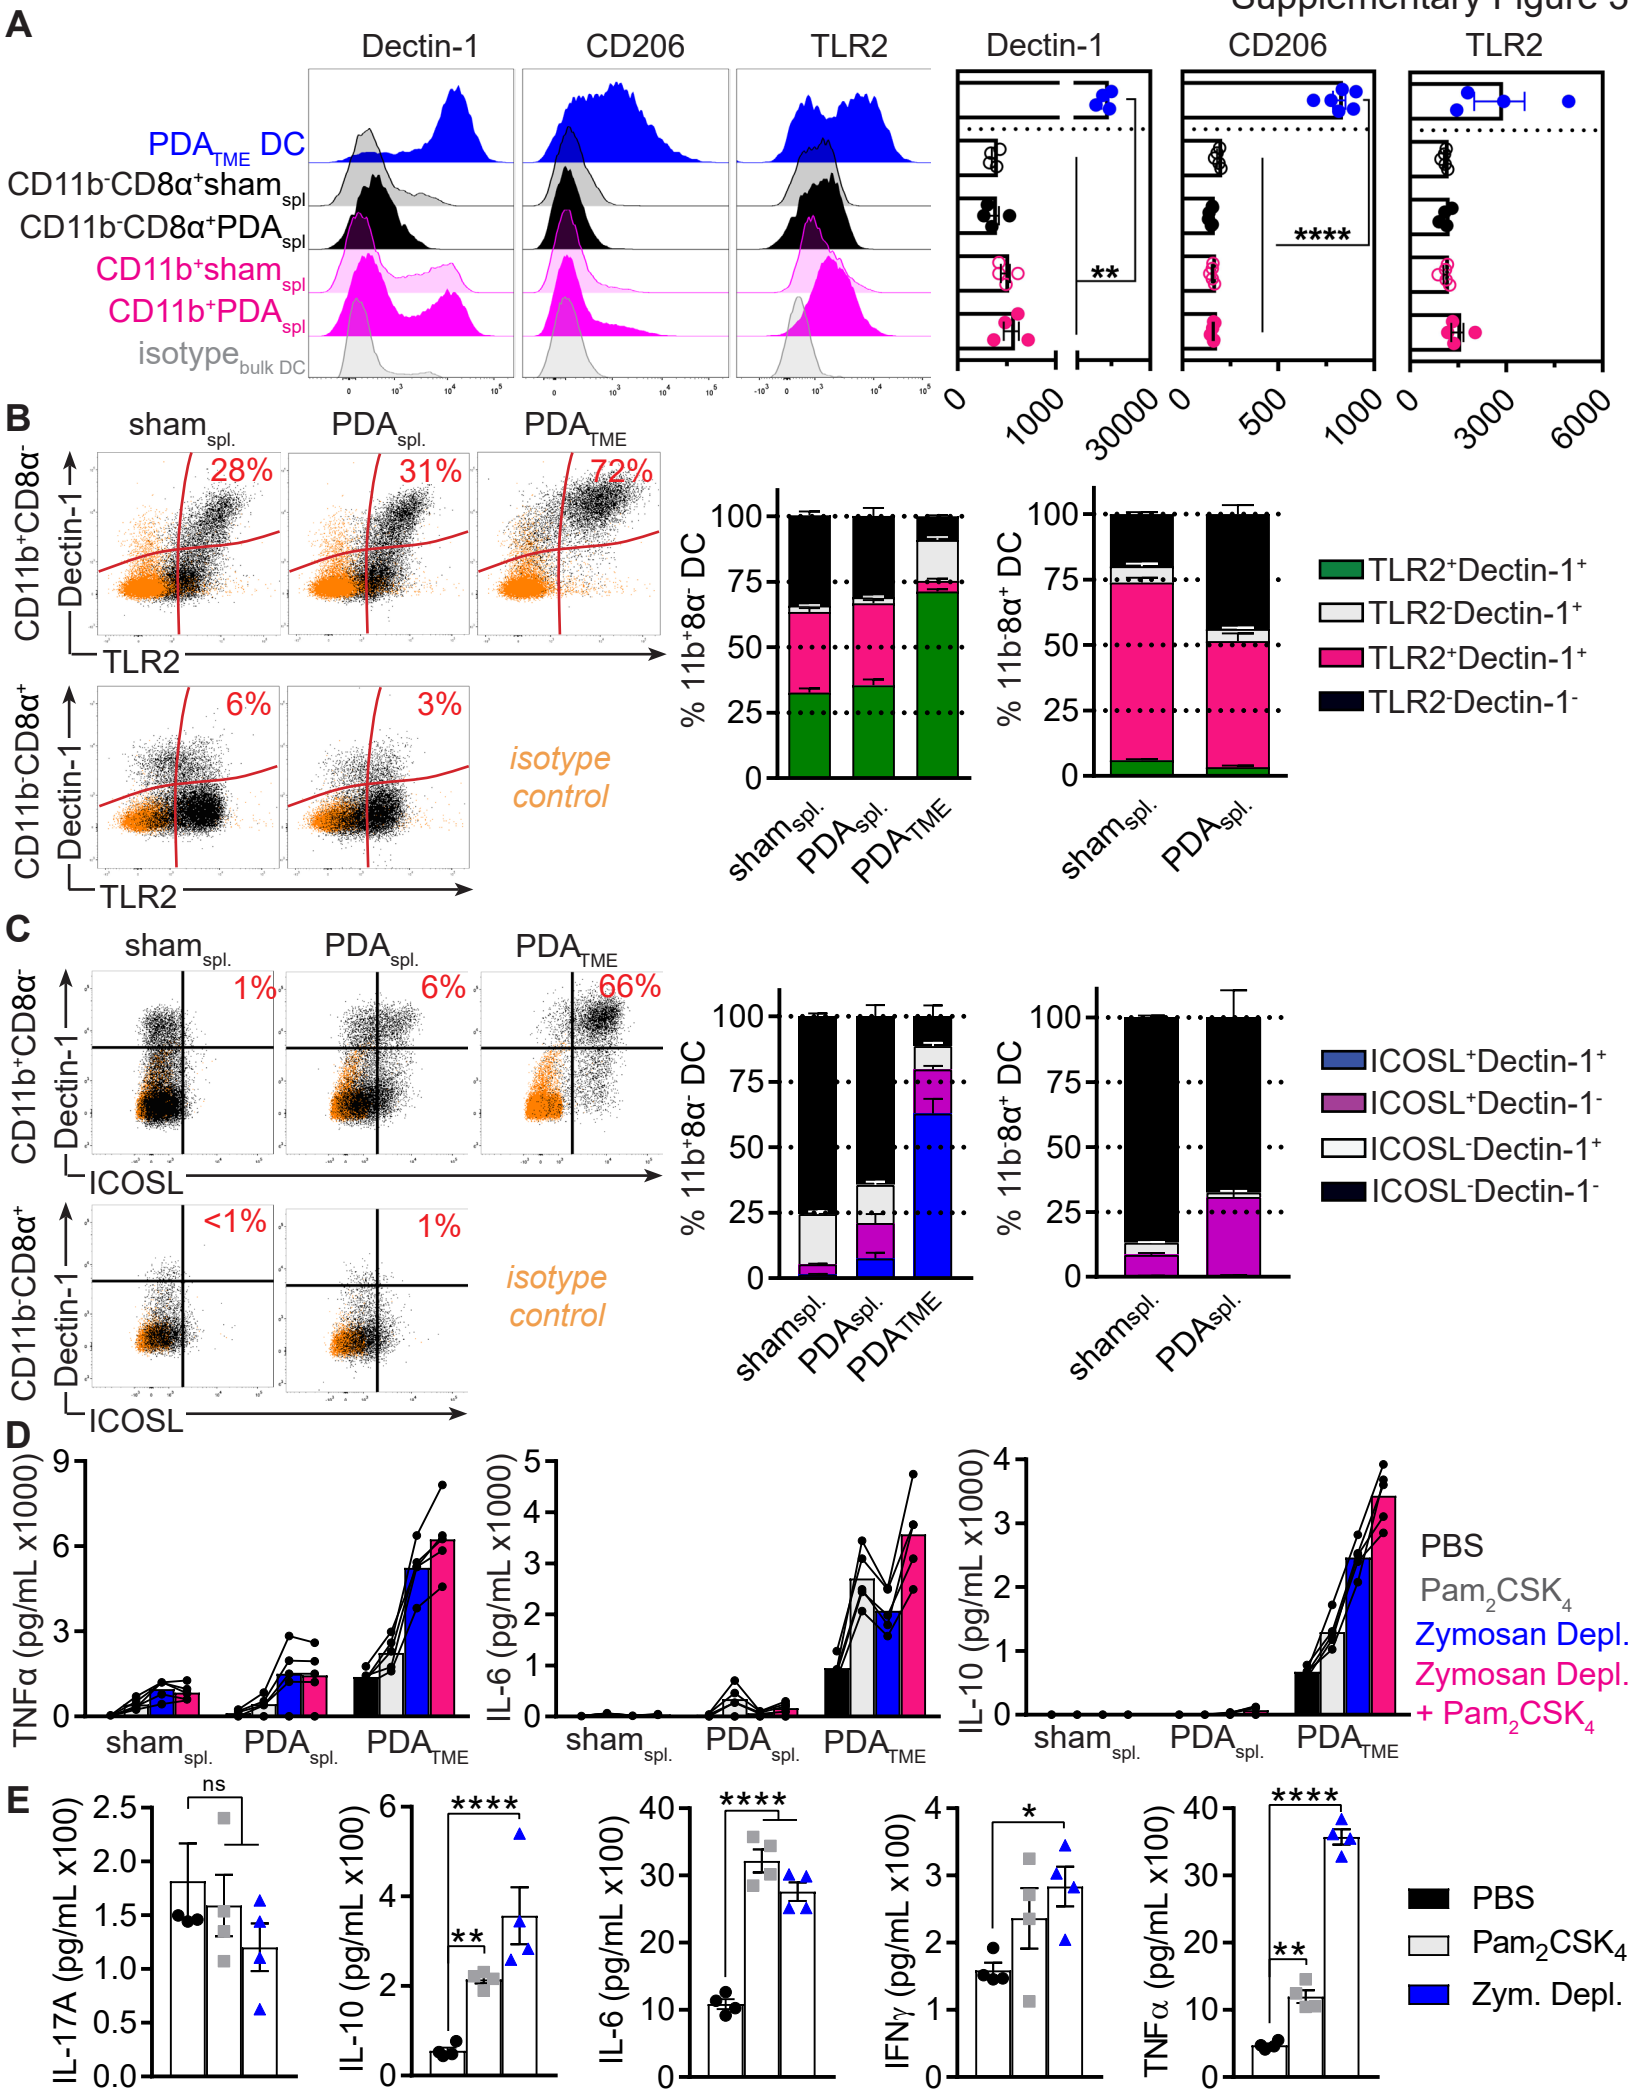



**Supplemental Figure 3. DC in PDA exhibit unique responses to PRR ligation.**

**(A)** PDA<sub>TME</sub> DC and CD11b<sup>+</sup>CD8 $\alpha$ <sup>-</sup> and CD8 $\alpha$ <sup>+</sup>CD11b<sup>-</sup> PDA<sub>spl.</sub> and sham<sub>spl.</sub> DC were tested for expression of Dectin-1, CD206, and TLR2. Representative histograms and quantitative data based on MFI are shown. Gating strategy for each marker was determined by the fluorescence of the respective isotype control (not shown). Experiments were repeated more than 3 times.

**(B)** Comparison of co-expression of Dectin-1 and TLR2 in PDA<sub>TME</sub> DC and CD11b<sup>+</sup>CD8 $\alpha$ <sup>-</sup> and CD8 $\alpha$ <sup>+</sup>CD11b<sup>-</sup> PDA<sub>spl.</sub> DC and sham<sub>spl.</sub> DC. Representative dot plots and quantitative data are shown. Orange dots indicate staining using isotype control. Data represents one of >3 independent experiments with n=4-7, showing similar results.

**(C)** Comparison of co-expression of Dectin-1 and ICOSL in PDA<sub>TME</sub> DC and CD11b<sup>+</sup>CD8 $\alpha$ <sup>-</sup> and CD8 $\alpha$ <sup>+</sup>CD11b<sup>-</sup> PDA<sub>spl.</sub> DC and sham<sub>spl.</sub> DC. Representative and quantitative data are shown. Orange dots indicate staining using isotype control. Data represents one of >3 independent experiments (n=4-7).

**(D)** Bulk PDA<sub>TME</sub>, PDA<sub>spl.</sub> DC, and sham<sub>spl.</sub> DC were cultured at a density of 5x10<sup>5</sup> cells/ml with either PBS, Dectin-1 ligand (Zymosan depleted), TLR2 ligand (Pam<sub>2</sub>CSK<sub>4</sub>), alone or in combination. Cytokine concentrations in cell culture supernatant were determined at 36h. Experiments were repeated 3 times.

**(E)** PDA<sub>TME</sub> DC were cultured with PBS, Zymosan depleted, or Pam<sub>2</sub>CSK<sub>4</sub>, loaded with Ova<sub>323-339</sub> peptide, and used to stimulate OT-II T cells (1:5 ratio). T cell expression of IL-17A, IL-10, IL-6, IFN $\gamma$ , and TNF $\alpha$  was assessed at 5 days. Data represent one of 3 independent experiments with n=3-5, showing similar results (\*p<0.05, \*\*p<0.01, \*\*\*\*p<0.0001, *t*-test), SEM.

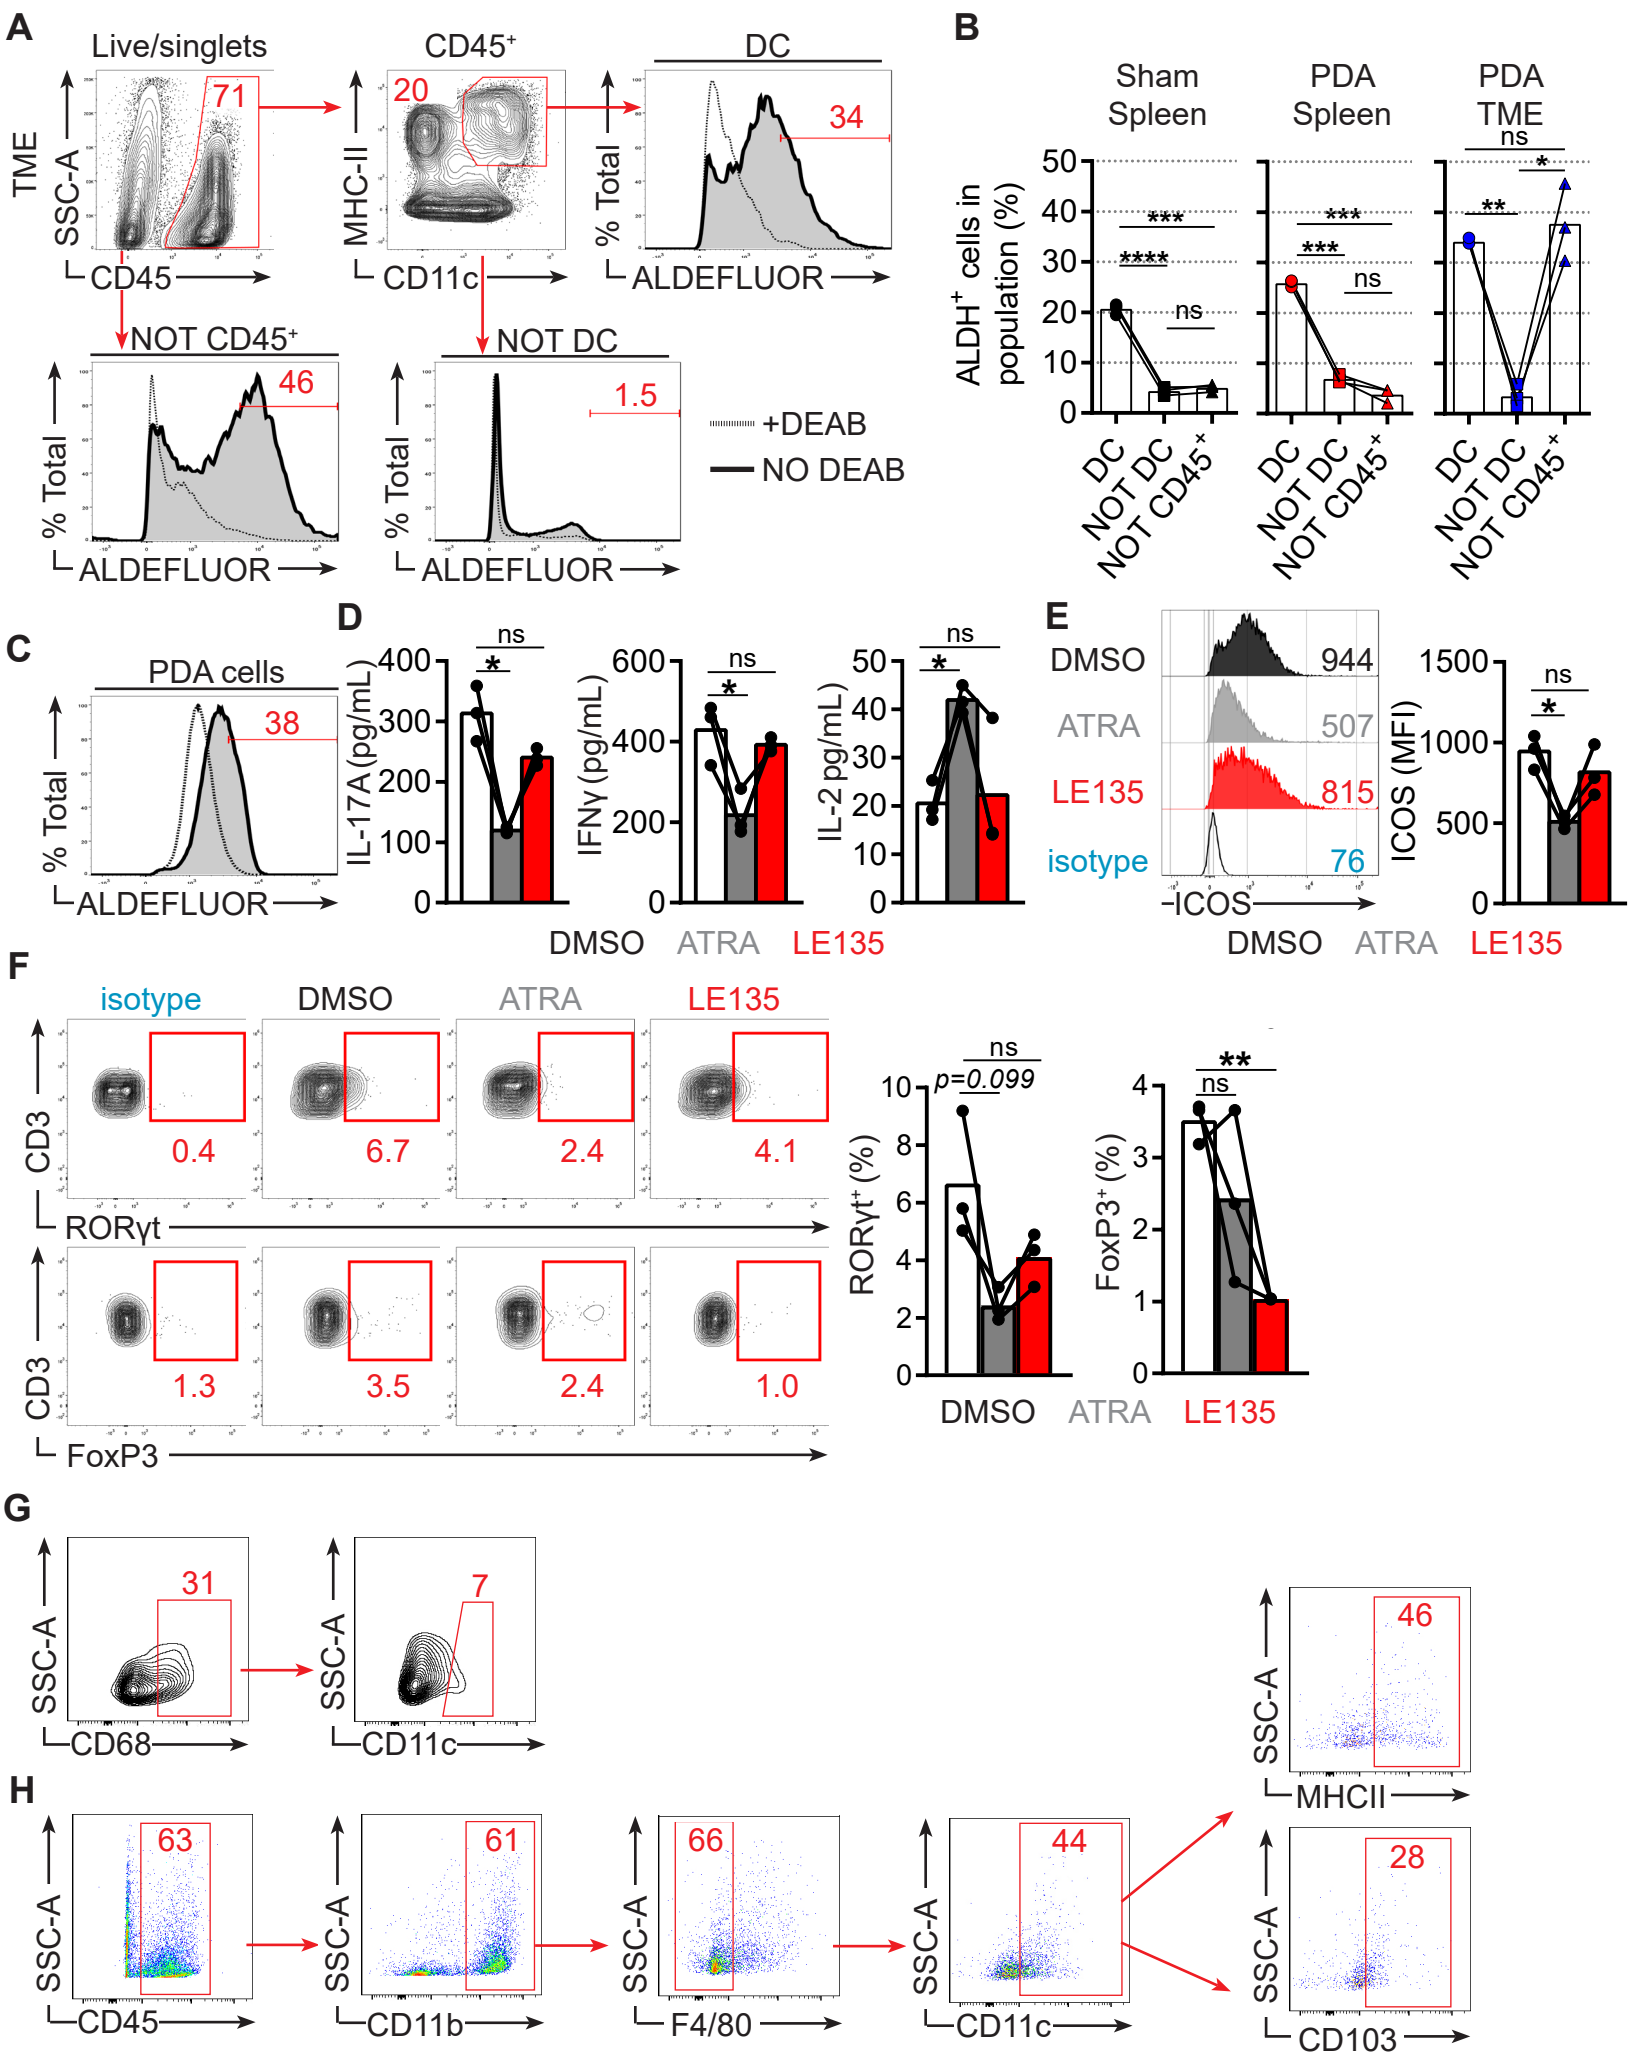

**Supplemental Figure 4. Retinoic Acid modulates PDA<sub>TME</sub> DC-mediated T<sub>H</sub> differentiation.**

**(A, B)** Enzymatic activity of ALDH in PDA<sub>TME</sub> DC, non-inflammatory cells (“NOT CD45<sup>+</sup>”), and non-DC leukocytes (“NOT DC”) was determined by the ALDEFLUOR assay.

Representative (A) and quantitative (B) data including Sham<sub>Spl.</sub> and PDA<sub>Spl.</sub> controls are shown.

Gates for each biological sample (shaded, solid histogram) were determined by the fluorescence of their respective DEAB controls (dotted histogram) and reflect the ALDH<sup>+</sup> frequencies quantified. This experiment was repeated twice.

**(C)** Enzymatic activity of ALDH in cultured KPC-derived PDA tumor cells was determined by the ALDEFLUOR assay. This experiment was repeated twice.

**(D)** Concentrations of supernatant cytokines in CD4<sup>+</sup> OT-II T cells co-cultures with Ova-pulsed PDA<sub>TME</sub> DCs for 96h in the presence of either a vehicle (DMSO), ATRA, or LE135. This experiment was repeated twice.

**(E)** Representative and quantitative flow cytometric data on ICOS expression in CD4<sup>+</sup> T cells from PDA<sub>TME</sub> DC co-cultures in (D) are shown. This experiment was repeated twice.

**(F)** Representative and quantitative flow cytometric data on ROR $\gamma$ t and FoxP3 expression in CD4<sup>+</sup> T cells from PDA<sub>TME</sub> DC co-cultures in (D). Representative and quantitative data are shown. This experiment was repeated twice.

**(G)** Representative flow cytometric data showing expression of CD11c on tumor associated macrophages in orthotopic PDA tumors. This experiment was repeated more than 5 times.

**(H)** CD45<sup>+</sup> leukocytes infiltrating orthotopic PDA tumors were tested for CD11b, F480, CD11c, MHC II, and CD103 expression. This experiment was repeated more than 5 times (\*p<0.05,

\*\*p<0.01, \*\*\*p<0.001, \*\*\*\*p<0.0001, *t*-test), SEM.

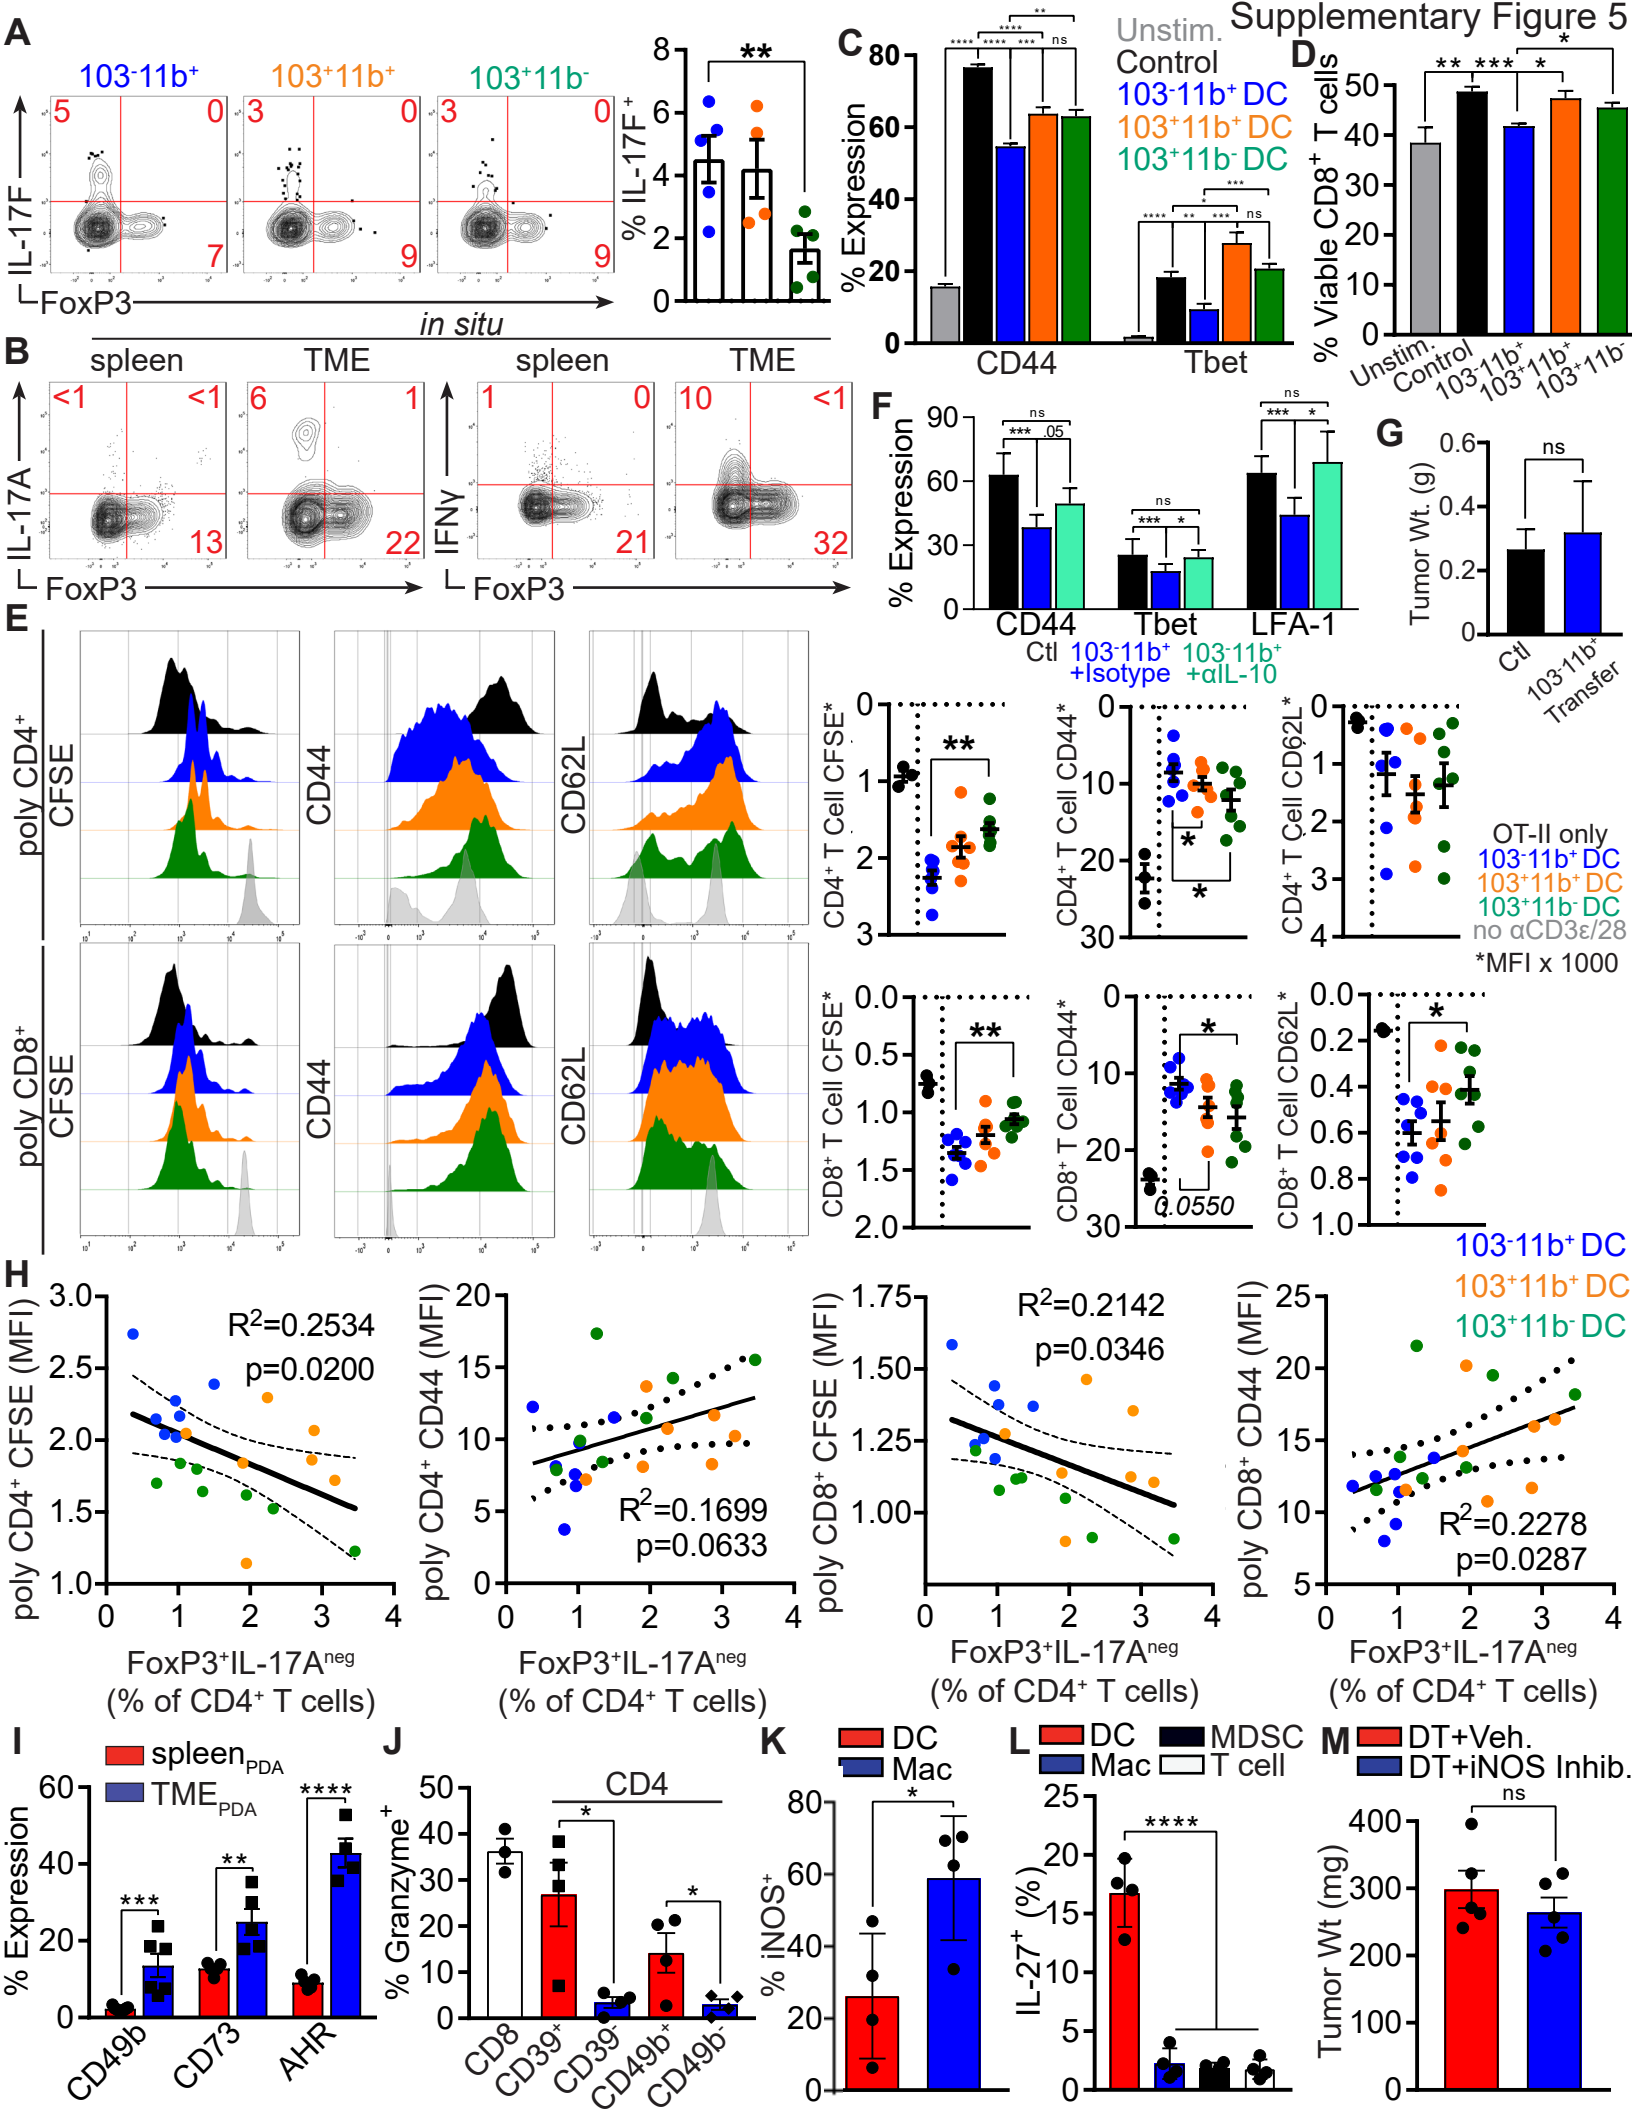

**Supplemental Figure 5. CD4<sup>+</sup> T cells differentiated by select subsets of PDA-infiltrating DC are immune-suppressive.**

(A) Ova-restricted CD4<sup>+</sup> T cells that were selectively entrained for 8 days by Ova<sub>323-339</sub> peptide-pulsed PDA<sub>TME</sub> DC subsets were tested for co-expression of IL-17F and FoxP3. Representative contour plots and quantitative data are shown. This experiment was reproduced more than 3 times.

(B) CD4<sup>+</sup> T cells from tumor or spleen of PDA-bearing mice were assessed for co-expression of IL-17A / FoxP3 and IFN $\gamma$  / FoxP3. Representative data are shown. This experiment was reproduced more than 5 times.

(C) Naive polyclonal CD8<sup>+</sup> T cells isolated from the spleens of WT mice were cultured for 96h on  $\alpha$ CD3 $\epsilon$ / $\alpha$ CD28 coated plates alone or in the presence of OT-II CD4<sup>+</sup> T cells harvested from OT-II CD4<sup>+</sup> T cell / PDA<sub>TME</sub> DC subset co-cultures. Additional control polyclonal CD8<sup>+</sup> T cells were unstimulated. CD8<sup>+</sup> T cells were assessed by flow cytometry for expression of CD44 and Tbet. This experiment was repeated 4 times.

(D) Naive polyclonal CD8<sup>+</sup> T cells isolated from the spleens of WT mice were cultured for 96h on  $\alpha$ CD3 $\epsilon$ / $\alpha$ CD28 coated plates alone or in the presence of OT-II CD4<sup>+</sup> T cells harvested from OT-II CD4<sup>+</sup> T cell / PDA<sub>TME</sub> DC subset co-cultures. Additional control polyclonal CD8<sup>+</sup> T cells were unstimulated. CD8<sup>+</sup> T cells were assessed by flow cytometry using cell death markers. This experiment was repeated twice.

(E) CFSE-labeled naive CD8<sup>+</sup> or CD4<sup>+</sup> polyclonal T cells isolated from the spleens of WT mice were cultured for 96h on  $\alpha$ CD3 $\epsilon$ / $\alpha$ CD28 coated plates in the presence of conditioned media from either OT-II CD4<sup>+</sup> T cells cultured alone or select OT-II CD4<sup>+</sup> T cell / PDA<sub>TME</sub> DC subset co-cultures. Polyclonal CD8<sup>+</sup> and CD4<sup>+</sup> T cells were assessed by flow cytometry for CFSE-dilution,

CD62L expression, and CD44 expression. Representative and quantitative plots are shown. Each individual well from the OT-II / PDA<sub>TME</sub> DC subset co-cultures was used to generate conditioned media for a single well of polyclonal CD8<sup>+</sup> and CD4<sup>+</sup> T cells.

**(F)** Naive splenic WT polyclonal CD8<sup>+</sup> T cells were cultured for 96h on  $\alpha$ CD3 $\epsilon$ / $\alpha$ CD28 coated plates in the presence of vehicle or in co-culture with OT-II CD4<sup>+</sup> T cells entrained by CD103<sup>-</sup> CD11b<sup>+</sup> PDA<sub>TME</sub> DC, either alone or with a neutralizing  $\alpha$ IL-10 mAb. CD8<sup>+</sup> T cells were assessed by flow cytometry for expression of CD44, Tbet, and LFA-1. This experiment was repeated 3 times (n=5/group).

**(G)** KPC-derived tumor cells were orthotopically implanted in pancreata of IL-10<sup>-/-</sup> mice admixed with either PBS or CD103<sup>-</sup> CD11b<sup>+</sup> DC<sub>TME</sub> and sacrificed at 3 weeks. Quantitative data on tumor weight are shown (n=5/group).

**(H)** Scatter plots correlating the phenotypes of polyclonal T cells receiving the conditioned media described in (E) to the phenotype of the T<sub>H</sub>-cells of the respective OT-II / PDA<sub>TME</sub> DC subset co-culture generating the conditioned media. Linear regression was used to determine the best-fit line (solid) and displayed with 95% confidence intervals (dotted-lines); p-values indicate significance of a non-zero slope, determined by an F-test.

**(I)** Tumor and spleen were harvested on day 25 from mice bearing orthotopic PDA. Tumor-infiltrating and splenic CD4<sup>+</sup> T cells were assessed for expression of CD49b, CD73, and AHR. Representative and quantitative data are shown. This experiment was repeated more than 5 times.

**(J)** Orthotopic PDA tumor was harvested from WT mice on day 25. Tumor-infiltrating CD8<sup>+</sup> T cells and subsets of CD4<sup>+</sup> T cells were assessed for expression of Granzyme B. This experiment was repeated twice.

**(K)** Orthotopic PDA tumor was harvested from WT mice on day 25. DC<sub>TME</sub> and tumor-associated macrophages were tested for expression of iNOS by flow cytometry. This experiment was repeated twice.

**(L)** Orthotopic PDA tumor was harvested from WT mice on day 25. DC<sub>TME</sub>, F4/80<sup>+</sup> tumor-associated macrophages, Gr1<sup>+</sup>CD11b<sup>+</sup> myeloid-derived suppressor cells (MDSC), and T cells were tested for expression of IL-27 by flow cytometry. This experiment was repeated twice.

**(M)** WT mice were made chimeric using bone marrow from CD11c.DTR mice. Cohorts were challenged with orthotopic PDA 7 weeks later. Mice began serial treatment with DT as well as an iNOS inhibitor or vehicle on day 12. Tumor weight was measured at 25 days. This experiment was repeated twice (n=5; \*p<0.05, \*\*p<0.01, \*\*\*p<0.001, \*\*\*\*p<0.0001, *t*-test), SEM.

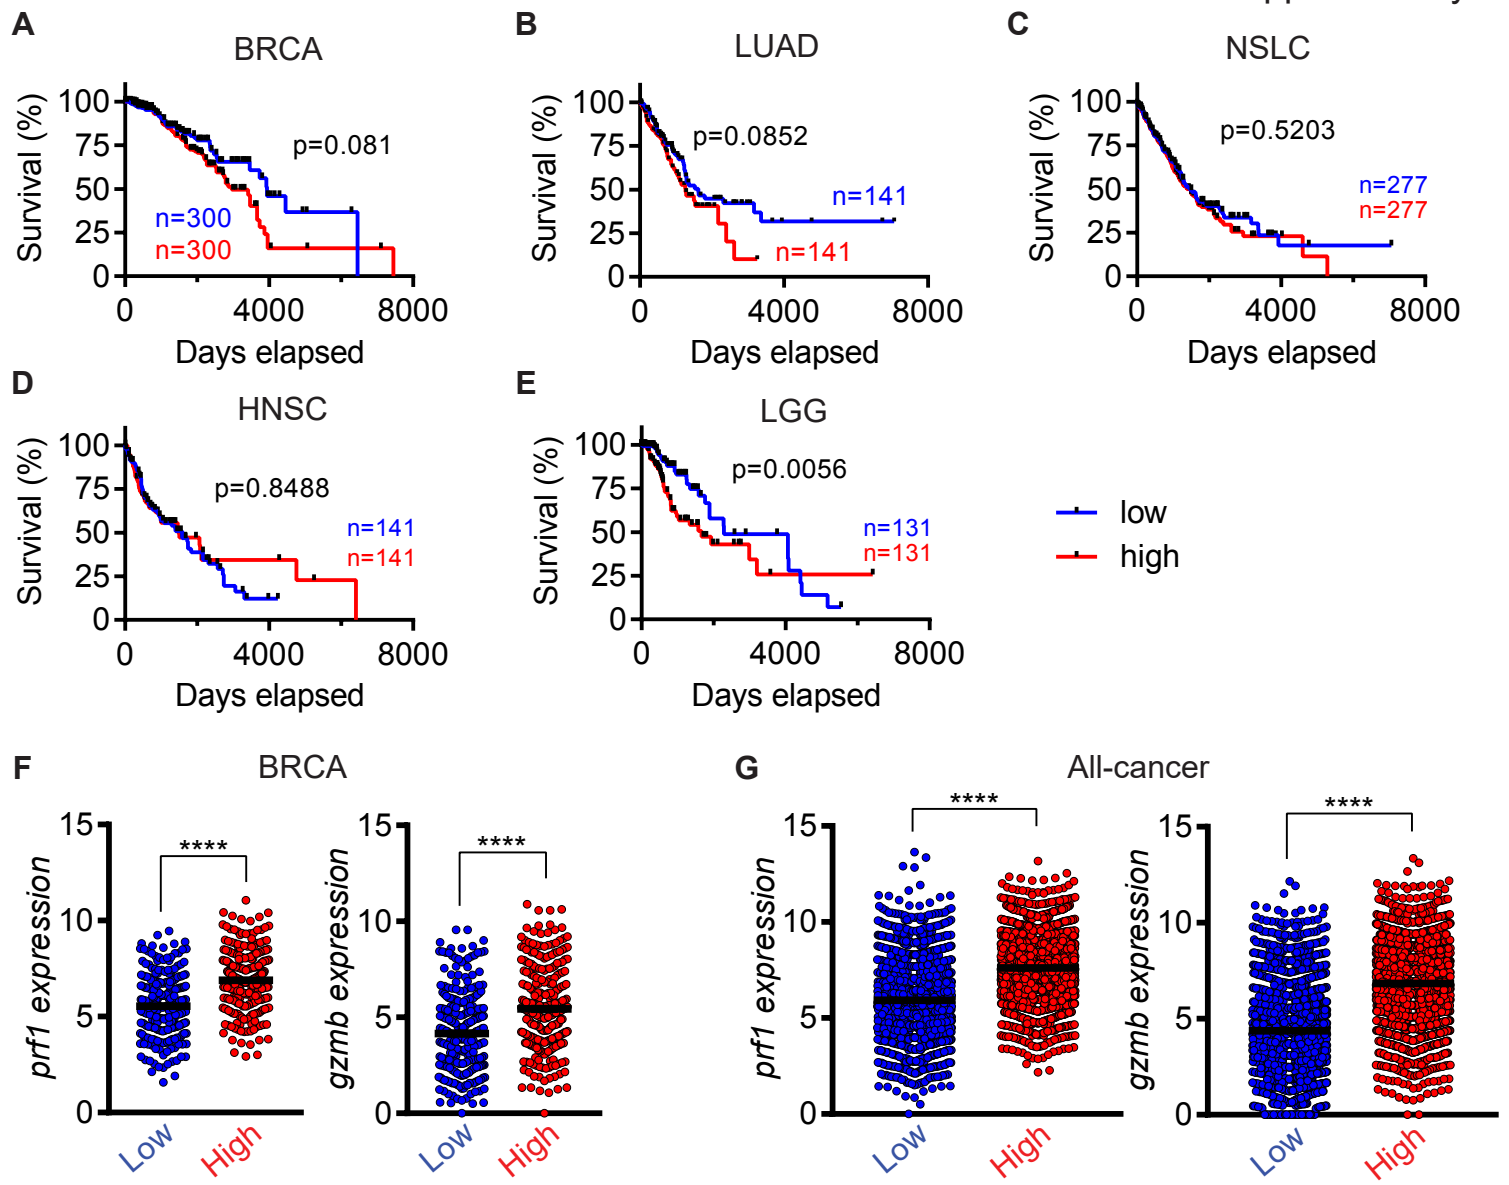



**Supplemental Figure 6. CD4<sup>+</sup> T programming is distinct in specific human cancers.**

**(A-E)** Patients from the TCGA database were stratified on the basis of validation signature scores (described in Figure 6) derived from tumor RNAseq gene expression (PolyA+ IlluminaHiSeq). Kaplan-Meier survival data comparing the highest (red) and lowest (blue) quartiles of patients from the BRCA (A), LUAD (B), NSLC (C), HNSC (D), and LGG (E) datasets are shown. P-values were calculated using the log-rank (Mantel-Cox) method.

**(F, G)** Plots represent *prfl* and *gzmb* RNAseq gene expression in the tumors of BRCA patients (F) and all cancers combined (G) from the highest (red) and lowest (blue) quartiles of the  $\Sigma Tr1 - \Sigma T_{REG}$  validation signature using RNAseq data from the TCGA database. All dot plots were analyzed with unpaired t tests with Welch's correction (\*\*\*\*p<0.0001).
